# Supplementary material
Source: Springer Nature journal article supplement (http://www.springermedizin.de/resource/supplementary/12876_2010_519_MOESM3_ESM.pdf/9436898)

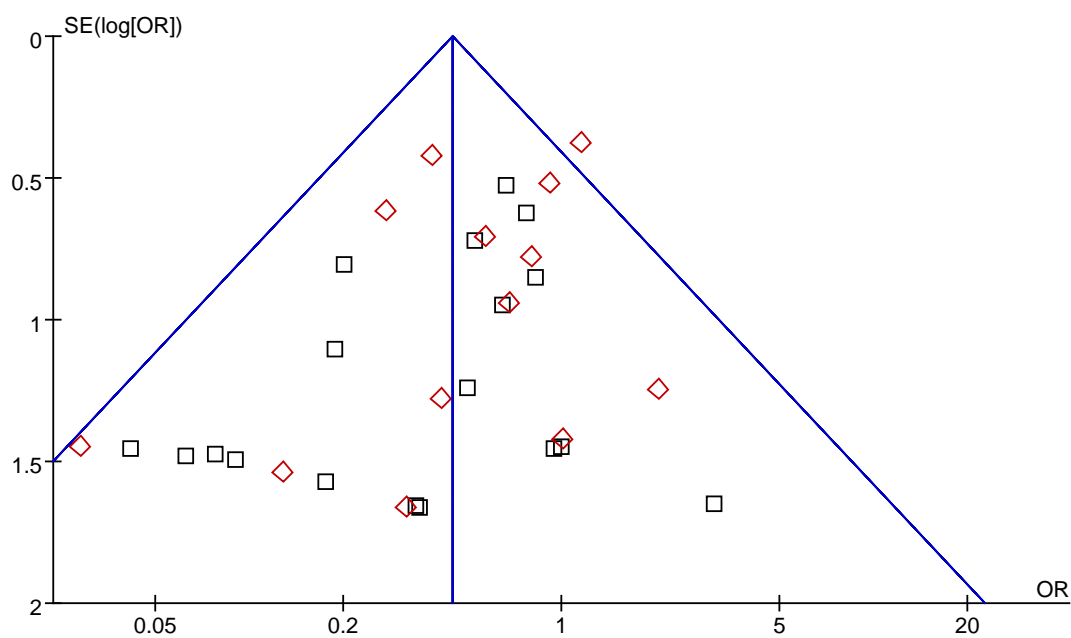

Supplement: MOESM3 [file 9436898]
